# Supplementary material for: Using 6-CIT, P300 encephalography, and pro-inflammation assessments for screening age related cognitive decline and exploring associated risk factors in Egyptian elderly
Source: Research Square preprint supplement (doi:10.21203/rs.3.rs-2711486/v1), 2023-03-30
Supplement: Supplementary file 1 [file d621ef13f10e39332b29c9ce.docx]

**Table 7. Testing the correlation between 6-CIT and its domains and cognitive decline risk factors; TNF-α, COX-2, age, BMI and chronic diseases**

|  | | **TNF-α** | **COX** | **Age** | **BMI** | **CD** | **TS** | **Q1** | **Q2** | **Q3** | **Q4** | **Q5** | **Q6** |
| --- | --- | --- | --- | --- | --- | --- | --- | --- | --- | --- | --- | --- | --- |
| **TNF-α** | ***r*** | 1 |  |  |  |  |  |  |  |  |  |  |  |
| ***p*** |  |  |  |  |  |  |  |  |  |  |  |  |
| ***N*** | 89 |  |  |  |  |  |  |  |  |  |  |  |
| **COX** | ***r*** | -0.080 | 1 |  |  |  |  |  |  |  |  |  |  |
| ***p*** | 0.457 |  |  |  |  |  |  |  |  |  |  |  |
| ***N*** | 89 | 89 |  |  |  |  |  |  |  |  |  |  |
| **Age** | ***r*** | 0.044 | -0.068 | 1 |  |  |  |  |  |  |  |  |  |
| ***p*** | 0.722 | 0.585 |  |  |  |  |  |  |  |  |  |  |
| ***N*** | 67 | 67 | 72 |  |  |  |  |  |  |  |  |  |
| **BMI** | ***r*** | -0.013 | -0.098 | **-0.324**** | 1 |  |  |  |  |  |  |  |  |
| ***p*** | 0.917 | 0.429 | **0.010** |  |  |  |  |  |  |  |  |  |
| ***N*** | 67 | 67 | **63** | 71 |  |  |  |  |  |  |  |  |
| **CD** | ***r*** | 0.075 | -0.173 | 0.076 | 0.003 | 1 |  |  |  |  |  |  |  |
| ***p*** | 0.528 | 0.140 | 0.540 | 0.983 |  |  |  |  |  |  |  |  |
| ***N*** | 74 | 74 | 67 | 65 | 79 |  |  |  |  |  |  |  |
| **TS** | ***r*** | -0.039 | -0.033 | 0.032 | -0.176 | -0.206 | 1 |  |  |  |  |  |  |
| ***p*** | 0.739 | 0.775 | 0.794 | 0.152 | 0.078 |  |  |  |  |  |  |  |
| ***N*** | 76 | 76 | 69 | 68 | 74 | 81 |  |  |  |  |  |  |
| **Q1** | ***r*** | -0.016 | -0.051 | -0.111 | 0.027 | 0.081 | 0.024 | 1 |  |  |  |  |  |
| ***p*** | 0.890 | 0.658 | 0.364 | 0.825 | 0.492 | 0.832 |  |  |  |  |  |  |
| ***N*** | 77 | 77 | 69 | 68 | 74 | 81 | 82 |  |  |  |  |  |
| **Q2** | ***r*** | -0.039 | 0.119 | 0.126 | -0.082 | -0.063 | 0.175 | -0.018 | 1 |  |  |  |  |
| ***p*** | 0.741 | 0.306 | 0.303 | 0.506 | 0.597 | 0.118 | 0.875 |  |  |  |  |  |
| ***N*** | 76 | 76 | 69 | 68 | 74 | 81 | 81 | 81 |  |  |  |  |
| **Q3** | ***r*** | -0.067 | -0.116 | -0.099 | 0.193 | -0.126 | **0.329**** | -0.048 | 0.062 | 1 |  |  |  |
| ***p*** | 0.565 | 0.318 | 0.421 | 0.115 | 0.284 | **0.003** | 0.670 | 0.583 |  |  |  |  |
| ***N*** | 76 | 76 | 69 | 68 | 74 | **81** | 81 | 81 | 81 |  |  |  |
| **Q4** | ***r*** | 0.167 | -0.066 | 0.174 | -0.195 | -0.065 | **0.412**** | -0.035 | 0.118 | -0.134 | 1 |  |  |
| ***p*** | 0.150 | 0.569 | 0.153 | 0.110 | 0.584 | **0.000** | 0.757 | 0.294 | 0.233 |  |  |  |
| ***N*** | 76 | 76 | 69 | 68 | 74 | **81** | 81 | 81 | 81 | 81 |  |  |
| **Q5** | ***r*** | -0.048 | -0.007 | 0.227 | **-0.375**** | -0.144 | **0.526**** | 0.035 | 0.050 | **-0.262*** | **0.286**** | 1 |  |
| ***p*** | 0.679 | 0.955 | 0.060 | **0.002** | 0.223 | **0.000** | 0.756 | 0.659 | **0.018** | **0.010** |  |  |
| ***N*** | 76 | 76 | 69 | **68** | 74 | **81** | 81 | 81 | **81** | **81** | 81 |  |
| **Q6** | ***r*** | -0.027 | 0.072 | -0.087 | -0.106 | -0.036 | **0.537**** | -0.113 | -0.091 | **-0.337**** | 0.115 | 0.199 | 1 |
| ***p*** | 0.815 | 0.538 | 0.478 | 0.390 | 0.763 | **0.000** | 0.315 | 0.417 | **0.002** | 0.307 | 0.074 |  |
| ***N*** | 76 | 76 | 69 | 68 | 74 | **81** | 81 | 81 | **81** | 81 | 81 | 81 |

*Q1;What year is it?, Q2;What month is it?, Q3; Repeating a memory phrase, Q4;What time is it?, Q5;Count back from 20 till 1, Q6; Saying months in reverse.*

*CD: chronic disease; BMI: body mass index; TS: total score*

*. Correlation is significant at the 0.05 level (2-tailed), ** Correlation is highly significant at the 0.01 level (2-tailed).

*r*; correlation coefficient, *P*; probability, *N*; number
